# Supplementary material
Source: PubMed Central journal article supplement (PMC10088368)
Supplement: mmc1.pdf [file mmc1.pdf]

## Supplemental material

Table S1

Multi-group (2020 vs 2021) Measurement Invariance of the Opportunities for Social Interaction

Scale

| Model                       | $\chi^2$   | <i>df</i> | $\chi^2/df$ | CFI  | RMSEA [90%CI]     | $\Delta\chi^2$ | $\Delta df$ | $\Delta CFI$ |
|-----------------------------|------------|-----------|-------------|------|-------------------|----------------|-------------|--------------|
| One-factor model            | 11.65 **   | 3         | 3.88        | .998 | .050 [.022, .081] |                |             |              |
| Configural multigroup model | 13.71 *    | 6         | 2.28        | .998 | .047 [.013, .080] | -              | -           | -            |
| Metric model                | 19.61 *    | 10        | 1.96        | .997 | .041 [.011, .067] | 5.91 <i>ns</i> | 4           | .001         |
| Scalar model                | 152.61 *** | 14        | 10.90       | .960 | .131 [.112, .150] | 133.00 ***     | 4           | .037         |

Note.  $\chi^2/df$  = chi-square divided by its degrees of freedom; CFI = comparative fit index; RMSEA = root mean square error of approximation.  $\Delta\chi^2$  = Delta chi-square;  $\Delta df$  = Delta degrees of freedom.

\*  $p < .05$ ; \*\*  $p < .01$ ; \*\*\*  $p < .001$ .

Table S2

Multi-group (2020 vs 2021) Measurement Invariance of the Engagement with Learning Scale

| Model                       | $\chi^2$   | <i>df</i> | $\chi^2/df$ | CFI  | RMSEA [90%CI]     | $\Delta\chi^2$  | $\Delta df$ | $\Delta CFI$ |
|-----------------------------|------------|-----------|-------------|------|-------------------|-----------------|-------------|--------------|
| Two-factor model            | 143.52 *** | 21        | 6.83        | .981 | .071 [.060, .082] |                 |             |              |
| Configural multigroup model | 188.24 *** | 42        | 4.48        | .977 | .077 [.066, .089] | -               | -           | -            |
| Metric model                | 190.49 *** | 49        | 3.89        | .978 | .070 [.060, .081] | 2.25 <i>ns</i>  | 7           | -.001        |
| Scalar model                | 202.38 *** | 56        | 3.61        | .977 | .067 [.057, .077] | 11.89 <i>ns</i> | 7           | .001         |

Note.  $\chi^2/df$  = chi-square divided by its degrees of freedom; CFI = comparative fit index; RMSEA = root mean square error of approximation.  $\Delta\chi^2$  = Delta chi-square;  $\Delta df$  = Delta degrees of freedom.

\*\*\*  $p < .001$ .
